# Supplementary material
Source: PubMed Central journal article supplement (PMC7781450)
Supplement: jiaa328_suppl_supplementary_material.pdf [file jiaa328_suppl_supplementary_material.pdf]

**SUPP TABLE 1:** Echocardiographic parameters of study participants stratified by HIV and dysfunction status.

| Variable<br>Mean (SD)                           | HIV-uninfected,<br>Dysfunction Negative<br>(n=421) | HIV-uninfected,<br>Dysfunction Positive<br>(n=40) | PLWH,<br>Dysfunction Negative<br>(n=337) | PLWH,<br>Dysfunction Positive<br>(n=51) |
|-------------------------------------------------|----------------------------------------------------|---------------------------------------------------|------------------------------------------|-----------------------------------------|
| <b>Systolic Measures</b>                        |                                                    |                                                   |                                          |                                         |
| <i>Left Ventricular Function</i>                |                                                    |                                                   |                                          |                                         |
| Ejection Fraction (%)                           | 66.4 (8.7)                                         | 66.3 (11.2)                                       | 66.5 (8.5)                               | 65.1 (10.2)                             |
| End Diastolic Volume (mL)                       | 61.6 (19.5)                                        | 56.9 (23.7)                                       | 61.6 (19.0)                              | 60.0 (22.9)                             |
| End Diastolic Volume Index (mL/m <sup>2</sup> ) | 36.2 (11.1)                                        | 33.5 (14.0)                                       | 37.0 (11.0)                              | 34.8 (13.9)                             |
| End Systolic Volume (mL)                        | 20.6 (8.5)                                         | 20.6 (15.4)                                       | 20.5 (8.2)                               | 21.1 (13.1)                             |
| End Systolic Volume Index (mL/m <sup>2</sup> )  | 12.1 (4.9)                                         | 12.1 (9.3)                                        | 12.3 (4.8)                               | 12.4 (8.6)                              |
| <b>Right Ventricular Function</b>               |                                                    |                                                   |                                          |                                         |
| TAPSE (cm)                                      | 2.2 (0.4)                                          | 2.2 (0.4)                                         | 2.2 (0.4)                                | 2.2 (0.5)                               |
| <b>Diastolic Measures</b>                       |                                                    |                                                   |                                          |                                         |
| <i>Pulse Doppler at Mitral Valve</i>            |                                                    |                                                   |                                          |                                         |
| E wave velocity (m/s)                           | 0.80 (0.16)                                        | 0.67 (0.23) <sup>^</sup>                          | 0.77 (0.15)                              | 0.66 (0.21) <sup>^</sup>                |
| A wave velocity (m/s)                           | 0.52 (0.16)                                        | 0.66 (0.22)                                       | 0.54 (0.15) <sup>@</sup>                 | 0.63 (0.20)                             |
| E wave deceleration time (ms)                   | 195.0 (42.3)                                       | 197.8 (53.7)                                      | 197.2 (46.6)                             | 188.6 (47.1) <sup>^</sup>               |
| E/A ratio                                       | 1.66 (0.6)                                         | 1.19 (0.9)                                        | 1.52 (0.4) <sup>@</sup>                  | 1.10 (0.3) <sup>^</sup>                 |
| <b>Tissue Doppler</b>                           |                                                    |                                                   |                                          |                                         |
| Lateral e' wave (cm/s)                          | 15.00 (2.7)                                        | 8.62 (1.57) <sup>^</sup>                          | 14.75 (2.5)                              | 8.92 (2.0) <sup>^</sup>                 |
| Septal e' wave (cm/s)                           | 11.16 (2.2)                                        | 6.35 (1.3) <sup>^</sup>                           | 10.56 (2.1) <sup>@</sup>                 | 6.66 (1.1) <sup>^</sup>                 |
| Average E/e'                                    | 6.40 (1.3)                                         | 9.42 (3.4) <sup>^</sup>                           | 6.44 (1.4)                               | 9.04 (2.8) <sup>^</sup>                 |
| <b>Structural Measures</b>                      |                                                    |                                                   |                                          |                                         |
| <i>Left Chamber Size</i>                        |                                                    |                                                   |                                          |                                         |
| Diastolic diameter (cm)                         | 4.21 (0.51)                                        | 4.28 (0.61)                                       | 4.19 (0.50)                              | 4.13 (0.59)                             |
| LV mass (g)                                     | 117.5 (30.2)                                       | 141.2 (45.0) <sup>^</sup>                         | 120.1 (33.3) <sup>^</sup>                | 134.1 (39.7)                            |
| Relative Wall Thickness                         | 0.43 (0.13)                                        | 0.45 (0.11)                                       | 0.44 (0.11)                              | 0.51 (0.19) <sup>#</sup>                |
| Left Atrial Volume Index (mL/m <sup>2</sup> )   | 19.0 (5.6)                                         | 24.6 (16.2) <sup>^</sup>                          | 19.7 (12.9)                              | 23.1 (11.3)                             |

Linear Regression (controlled for age, sex, systolic blood pressure and body mass index): <sup>^</sup>p<0.05 vs respective control, <sup>@</sup>p<0.05 vs HIV-uninfected/Dysfunction Negative, <sup>#</sup>p<0.05 vs HIV-uninfected, Dysfunction Positive

**SUPP TABLE 2: A.** Multivariate and **B.** univariate analysis of factors associated with diastolic dysfunction in PLWH and HIV-uninfected participants.

**A**

| Variable                             | <u>All Participants</u> |                   |
|--------------------------------------|-------------------------|-------------------|
|                                      | OR[CI]                  | <i>p-value</i>    |
| <b>Multivariate Model</b>            |                         | <b>&lt;0.0001</b> |
| Systolic Blood Pressure (mmHg)       | 1.03 [1.02-1.04]        | <b>&lt;0.0001</b> |
| HIV Infection                        | 2.71 [1.62-4.55]        | <b>&lt;0.0001</b> |
| Age (yrs)                            | 1.10 [1.07-1.13]        | <b>&lt;0.0001</b> |
| Body Mass Index (kg/m <sup>2</sup> ) | 1.00 [0.96-1.05]        | 0.901             |
| Sex                                  | 1.24 [0.71-2.18]        | 0.445             |

Logistic Regression: significant values in **bold**

**B**

| Variable                        | <u>PLWH</u>       |                   | <u>HIV-infected</u> |                   |
|---------------------------------|-------------------|-------------------|---------------------|-------------------|
|                                 | OR[CI]            | <i>p-value</i>    | OR[CI]              | <i>p-value</i>    |
| Female                          | 2.13 [0.96-4.75]  | 0.064             | 0.83 [0.44-1.57]    | 0.563             |
| Age                             | 1.12 [1.08-1.16]  | <b>&lt;0.0001</b> | 1.12 [1.08-1.16]    | <b>&lt;0.0001</b> |
| Body Mass Index<br>(continuous) | 1.10 [1.03-1.17]  | <b>0.005</b>      | 1.05 [1.00-1.10]    | <b>0.050</b>      |
| Body Mass Index<br>(stratified) |                   | <b>0.043</b>      |                     | 0.092             |
| <18.5 kg/m <sup>2</sup>         | 1.16 [0.37-3.62]  | 0.796             | 0.59 [0.22-1.60]    | 0.299             |
| 18.5-24.9 kg/m <sup>2</sup>     | -                 | -                 | -                   | -                 |
| 25-29.9 kg/m <sup>2</sup>       | 1.70 [0.76-3.79]  | 0.197             | 1.90 [0.87-4.14]    | 0.106             |
| >=30 kg/m <sup>2</sup>          | 3.81 [1.56-9.28]  | <b>0.003</b>      | 1.86 [0.80-4.29]    | 0.148             |
| Abdominal Obesity               | 1.84 [0.96-3.54]  | 0.067             | 2.49 [1.37-4.52]    | <b>0.003</b>      |
| Current Alcohol Use             | -                 | -                 | 0.94 [0.31-2.79]    | 0.906             |
| Current Tobacco Use             | 0.71 [0.20-2.49]  | 0.595             | 0.64 [0.18-2.34]    | 0.398             |
| Hypertension                    | 6.70 [3.18-14.11] | <b>&lt;0.0001</b> | 4.10 [2.16-7.77]    | <b>&lt;0.0001</b> |
| CD4 Count                       | 1.00 [0.99-1.00]  | 0.324             | 0.99 [0.99-1.00]    | 0.125             |
| Systolic Blood Pressure         | 1.05 [1.04-1.07]  | <b>&lt;0.0001</b> | 1.04 [1.02-1.05]    | <b>&lt;0.0001</b> |
| Diastolic Blood Pressure        | 1.10 [1.06-1.13]  | <b>&lt;0.0001</b> | 1.07 [1.04-1.09]    | <b>&lt;0.0001</b> |

\*Analyses were performed on non-missing data. No variable missing more than 4 data points.

Logistic Regression: significant values in **bold**

**SUPP FIGURE 1: Sex disaggregated myocardial diastolic dysfunction in PLWH and uninfected participants.**

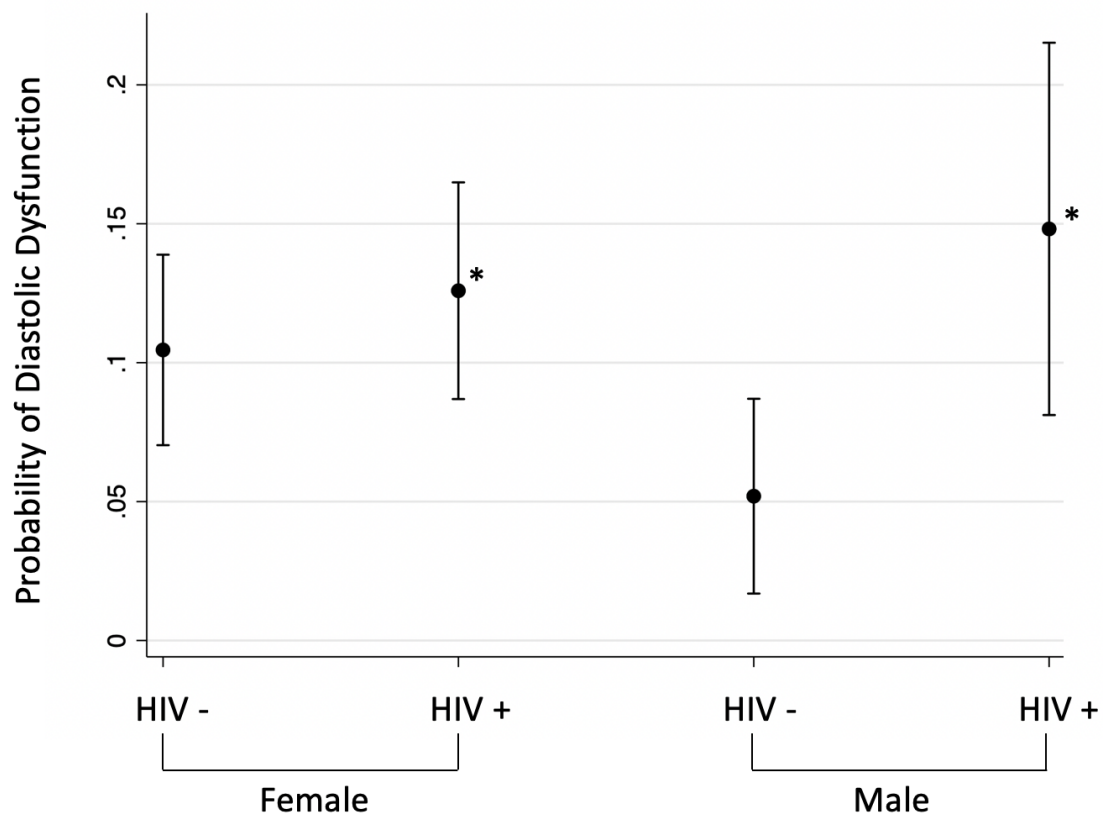

\*p<0.05 (adjusted for age, systolic blood pressure and BMI)

**SUPP FIGURE 2: Sex disaggregated serum ST2 concentration in PLWH and uninfected participants with and without myocardial diastolic dysfunction.**

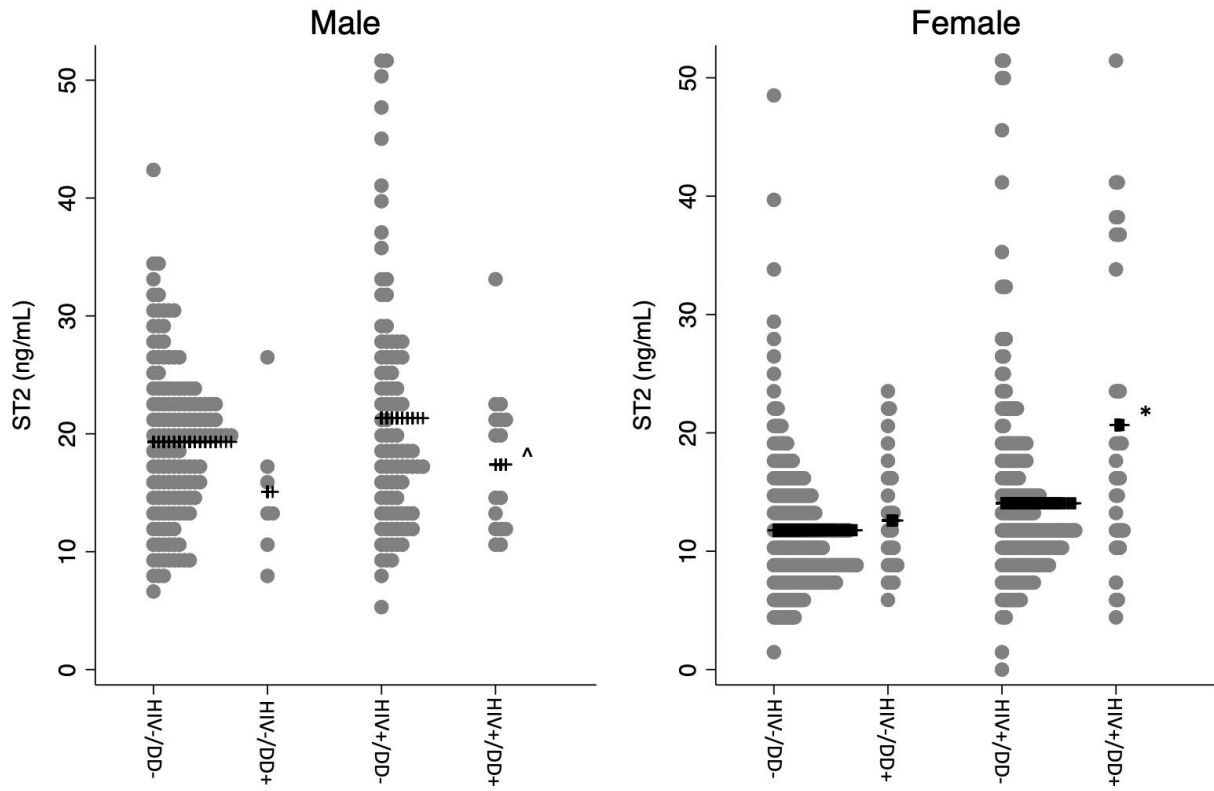

\*p<0.0001 vs control group (controlled for age, blood pressure and BMI)  
^p=0.146 vs control group (controlled for age, blood pressure, and BMI)  
DD: diastolic dysfunction
